# Supplementary material
Source: PubMed Central journal article supplement (PMC2818563)
Supplement: NIHMS161547-supplement-Supplementary_Material.pdf [file NIHMS161547-supplement-Supplementary_Material.pdf]

## Heterogeneous Tissue Model For Leucine

We have developed a heterogeneous tissue model for the behavior of leucine (Fig S1) in which we assume that each tissue is composed of two homogeneous subregions, e.g., (a) gray and (b) white matter. Activity in the tissue as a whole can be expressed as a convex linear combination of activity in its subregions (a and b) as

$$C_T^*(t) = (1 - V_b) \{ w_a [C_{Ea}^*(t) + P_a^*(t)] + w_b [C_{Eb}^*(t) + P_b^*(t)] + V_D C_c^*(t) \} + V_b C_b^*(t) \quad [1]$$

where  $w_a$  and  $w_b$  are the relative weights of subregions ( $w_a + w_b = 1$ ), and  $V_b$  is the fraction of the region's volume occupied by blood.

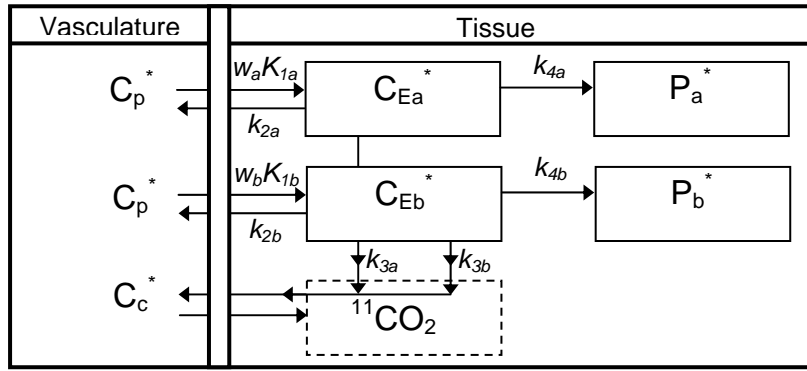

**Fig S1. Heterogeneous Tissue Model for Leucine**

If subregions  $a$  and  $b$  are characterized by parameter sets  $\{K_{1a}, k_{2a} + k_{3a}, k_{4a}\}$  and  $\{K_{1b}, k_{2b} + k_{3b}, k_{4b}\}$ , respectively, then

$$C_T^*(t; \boldsymbol{\rho}) = (1 - V_b) \left\{ \left( \frac{w_a K_{1a} (k_{2a} + k_{3a})}{k_{2a} + k_{3a} + k_{4a}} \right) \int_0^t C_p^*(\tau) e^{-(k_{2a} + k_{3a} + k_{4a})(t - \tau)} d\tau \right. \\ \left. + \left( \frac{w_b K_{1b} (k_{2b} + k_{3b})}{k_{2b} + k_{3b} + k_{4b}} \right) \int_0^t C_p^*(\tau) e^{-(k_{2b} + k_{3b} + k_{4b})(t - \tau)} d\tau \right. \\ \left. + \left( \frac{w_a K_{1a} k_{4a}}{k_{2a} + k_{3a} + k_{4a}} + \frac{w_b K_{1b} k_{4b}}{k_{2b} + k_{3b} + k_{4b}} \right) \int_0^t C_p^*(\tau) d\tau + V_D C_c^*(t) \right\} + V_b C_b^*(t). \quad [2]$$

For this model, the parameter vector is  $\boldsymbol{\rho} = [w_a K_{1a}, w_b K_{1b}, k_{2a} + k_{3a}, k_{2b} + k_{3b}, k_{4a}, k_{4b}, V_b]$ . Only six parameters can be estimated from Eq [2] – three integral coefficients, two

exponents, and  $V_b$ . ( $V_D$  is assumed known *a priori*). The single constraint that  $\lambda_a = \lambda_b$ , motivated by the observation that regional variation in  $\lambda$  is small (Bishu *et al*, 2008), allows all seven parameters to be estimated. Weighted average rCPS in the region can be calculated as

$$\text{rCPS} = \left( \frac{w_a K_{1a} k_{4a}}{k_{2a} + k_{3a}} + \frac{w_b K_{1b} k_{4b}}{k_{2b} + k_{3b}} \right) C_p \quad [3]$$

and lambda as

$$\lambda = \frac{k_{2a} + k_{3a}}{k_{2a} + k_{3a} + k_{4a}} = \frac{k_{2b} + k_{3b}}{k_{2b} + k_{3b} + k_{4b}}. \quad [4]$$

The weighted average influx rate constant for the mixed tissue,  $K_1$ , can also be determined as  $w_a K_{1a} + w_b K_{1b}$ , but averages of  $k_2 + k_3$  and  $k_4$  are not identifiable from estimated parameters since  $w_a$  and  $w_b$  are not independently known.
